# Supplementary material for: Cubic spinel In4SnS8: electrical transport properties and electrochemical hydrogen storage properties
Source: Royal Society of Chemistry journal article supplement (doi:10.1039/c0dt00060d), 2010-01-01
Supplement: c0dt00060d.pdf [file c0dt00060d.pdf]

## **Cubic Spinel $\text{In}_4\text{SnS}_8$ : the Electrical Transport Property and Electrochemical Hydrogen storage Property**

Yongqian Lei,<sup>a,b</sup> Guanhua Wang,<sup>a,b</sup> Liang Zhou,<sup>a,b</sup> Wen Hu,<sup>a,b</sup> Shuyan Song,<sup>a,b</sup>  
Weiqiang Fan,<sup>a,b</sup> and Hongjie Zhang<sup>\*,a</sup>

<sup>a</sup>*State Key Laboratory of Rare Earth Resource Utilizations, Changchun Institute of Applied Chemistry, Chinese Academy of Sciences, Changchun, 130022, Jilin, China.*

<sup>b</sup>*Graduate School of the Chinese Academy of Sciences, Beijing, 100039, P. R. China*

\*E-mail: [hongjie@ciac.jl.cn](mailto:hongjie@ciac.jl.cn); Fax: +86-431-85698041; Tel: +86-431-85262127

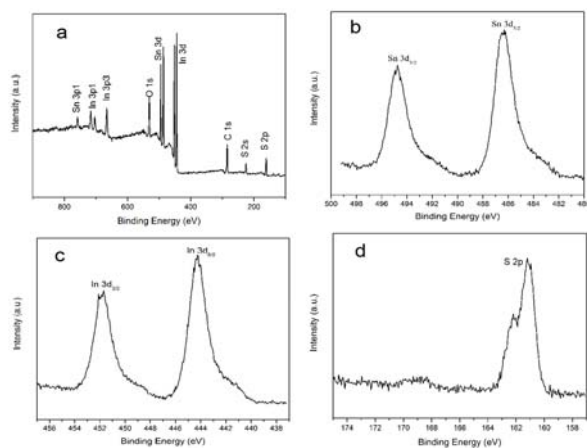

**Fig. S1.** a) Overall XPS spectrum of the sample. b) The high resolution spectrum of Sn 3d. c) the high resolution spectrum of In 3d. d) The high resolution spectrum of S 2p.

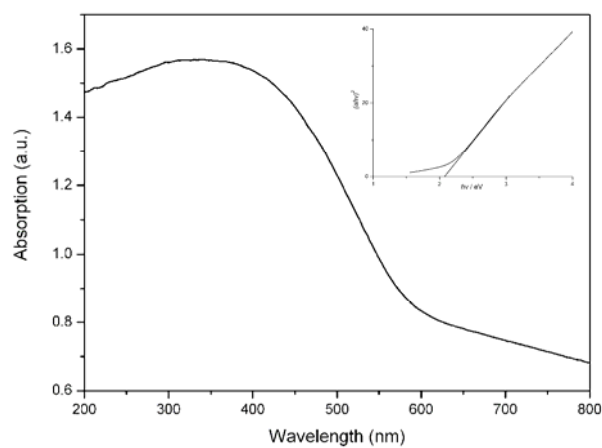

**Fig, S2.** The UV-Vis absorption spectrum of the sample and the corresponding calculated diagram of the band gap.
